# Supplementary material for: High temperature phase transitions in N,N-diisopropylpropan-1-ammonium perchlorate
Source: Royal Society of Chemistry journal article supplement (doi:10.1039/c4ce02562h), 2015-01-01
Supplement: c4ce02562h1.pdf [file c4ce02562h1.pdf]

Supporting information

## High temperature phase transitions in N, N-diisopropylpropan-1-ammonium perchlorate

Wen-Xiang Wang\*, Yao Huang

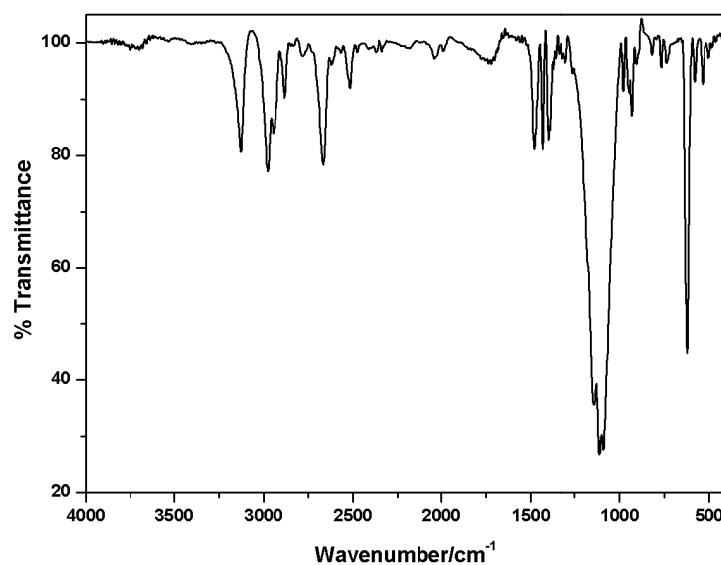

Fig S1 IR for N, N-diisopropylpropan-1-ammonium perchlorate (DAP)

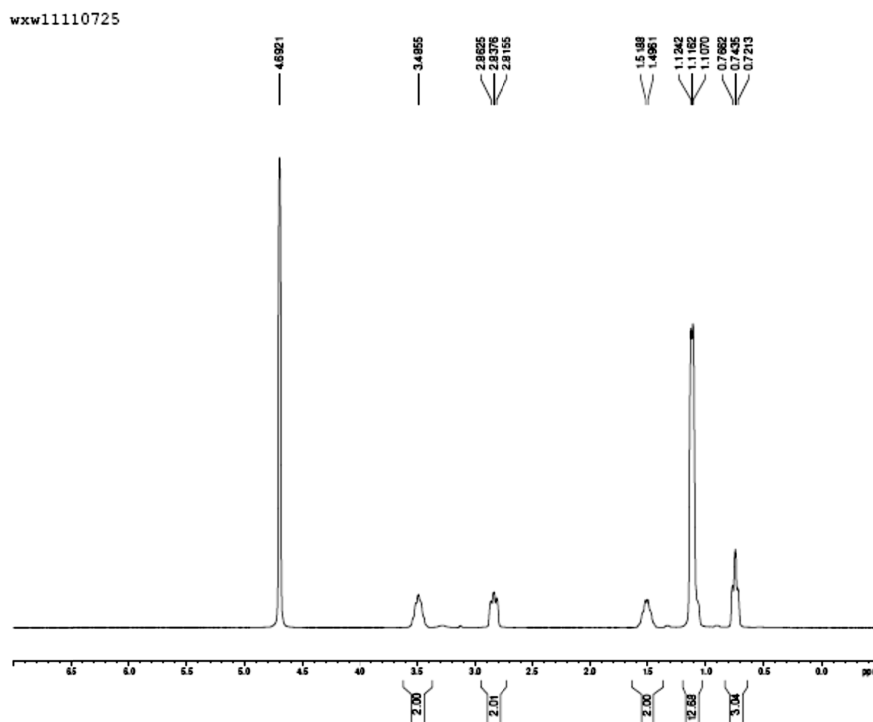

Fig S2 <sup>1</sup>H NMR for DAP

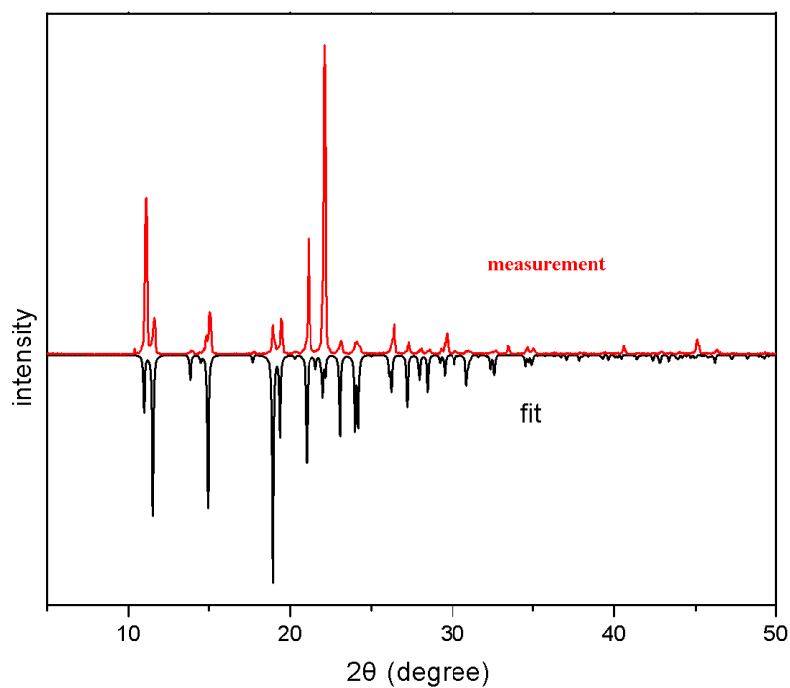

**Fig S3 X-ray powder diffraction (XRPD) of DAP**

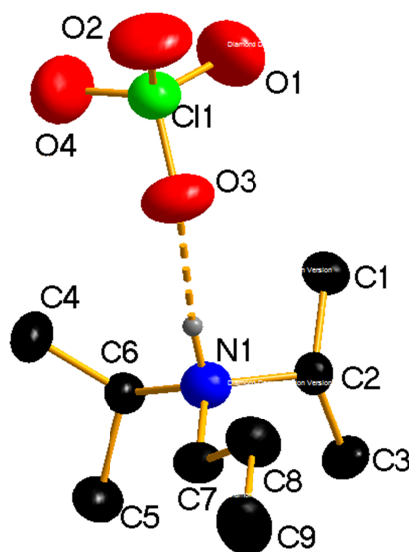

**Fig S4 Asymmetric unit of DAP at 293K**

The crystal structure was solved by direct methods and refined by the full-matrix method based on  $F^2$  using the SHELXL2014 software package (Sheldrick, 1997). Displacement ellipsoids are drawn at the 50% probability level.

All H atoms attached to C atoms were omitted. The N-H...O hydrogen bond are indicated by a dotted line.

**Table S1** Summary of crystallographic data for DAP

| <b>I</b>                                                |                                                                              |
|---------------------------------------------------------|------------------------------------------------------------------------------|
| Molecular formula                                       | C <sub>9</sub> H <sub>22</sub> NClO <sub>4</sub>                             |
| Formular weigh                                          | 243.73                                                                       |
| Crystal system,                                         | Orthorhombic                                                                 |
| space group                                             | <i>Pna</i> 2 <sub>1</sub>                                                    |
| Temperature (K)                                         | 293(2)                                                                       |
| <i>a</i> (Å)                                            | 16.126(3),                                                                   |
| <i>b</i> (Å)                                            | 8.7468(17),                                                                  |
| <i>c</i> (Å)                                            | 9.3691(19)                                                                   |
| $\alpha$ (°)                                            | 90,                                                                          |
| $\beta$ (°)                                             | 90,                                                                          |
| $\gamma$ (°)                                            | 90                                                                           |
| <i>V</i> (Å <sup>3</sup> )                              | 1321.5(5)                                                                    |
| <i>Z</i>                                                | 4                                                                            |
| Calculated density(Mg/m <sup>3</sup> )                  | 1.225                                                                        |
| Flack parameter                                         | 0.13(8)                                                                      |
| <i>F</i> (000)                                          | 528                                                                          |
| <i>h, k, l</i> (min, max)                               | (-20, 20); (-11, 11); (-12, 12)                                              |
| Reflections collected / unique                          | 13071 / 3018 [ <i>R</i> ( <i>int</i> ) = 0.0575]                             |
| Completeness                                            | 99.9 % (to $\theta = 27.48^\circ$ )                                          |
| GOF on <i>F</i> <sup>2</sup>                            | 1.046                                                                        |
| Final <i>R</i> indices [ <i>I</i> > 2sigma( <i>I</i> )] | <sup>a</sup> <i>R</i> <sub>1</sub> = 0.0491, <i>wR</i> <sub>2</sub> = 0.1052 |
| <i>R</i> indices (all data)                             | <sup>a</sup> <i>R</i> <sub>1</sub> = 0.0805, <i>wR</i> <sub>2</sub> = 0.1173 |
| Largest diff. peak and hole (e. Å <sup>-3</sup> )       | 0.151 and -0.221                                                             |

$$^a R_1 = \frac{\sum ||F_o| - |F_c||}{\sum |F_o|}; wR_2 = \left\{ \frac{\sum [w(F_o^2 - F_c^2)^2]}{\sum [w(F_o^2)]} \right\}^{1/2}$$

**Table SII** Selected distances (Å) and angles (°) of DAP

| Bond length |          | Angle           |            |
|-------------|----------|-----------------|------------|
| N(1)-C(7)   | 1.489(4) | C(7)-N(1)-C(6)  | 114.1(2)   |
| N(1)-C(6)   | 1.538(3) | C(7)-N(1)-C(2)  | 112.4(2)   |
| N(1)-C(2)   | 1.536(4) | C(6)-N(1)-C(2)  | 114.6(2)   |
| N(1)-H(1D)  | 0.9100   | C(7)-N(1)-H(1D) | 104.8      |
| Cl(1)-O(4)  | 1.402(2) | C(8)-C(7)-N(1)  | 116.0(3)   |
| Cl(1)-O(1)  | 1.407(2) | O(4)-Cl(1)-O(1) | 110.26(17) |
| Cl(1)-O(2)  | 1.417(3) | O(2)-Cl(1)-O(3) | 108.87(14) |
| Cl(1)-O(3)  | 1.432(2) | C(7)-N(1)-C(6)  | 114.1(2)   |
